# Supplementary material
Source: Royal Society of Chemistry journal article supplement (doi:10.1039/d5em01017a)
Supplement: d5em01017a1.xlsx [file d5em01017a1.xlsx]

## Sheet: Table of Contents
Microplastics and PMT plastic-associated chemicals as co-contaminants in ice shaving waste from an urban ice rink
Yanan Lia*, Ryan H. S. Hutchinsa, Claire Oswaldb, Stefania Impellizzeria*, Roxana Sühringa
a Department of Chemistry and Biology, Toronto Metropolitan University, 350 Victoria St, Toronto, ON, M5B 2K3, Canada
b Department of Geography and Environmental Studies, Toronto Metropolitan University, 350 Victoria St, Toronto, ON, M5B 2K3, Canada
*Corresponding authors:
Yanan Li, email: yanan.li@torontomu.ca
Stefania Impellizzeri, email: simpellizzeri@torontomu.ca
Roxana Sühring, email: roxana.suehring@torotnomu.ca
Table of Contents
Table. SB1	List of PMT plastic additives used for suspect screening with physical chemical properties data and their known function

## Sheet: Table SB1
	Table. SB1. List of PMT plastic-associated chemicals used for suspect screening with physical chemical properties data and their known functions and applicationsa
CAS_Number	Name	MolecularMass (g/mol)	Log Kow	Water Solubility (mg/L)	pKa	Functions and Applicationsb
68-22-4	(17α)-hydroxy-19-norpregn-4-en-20-yn-3-one	298.426	3.44486	7.04	N	Other
156-60-5	(1E)-1,2-dichloroethene	96.94	1.86	0.000484	-	Blowing Agent
98-82-8	(1-methylethyl)-benzene	120.195	3.66	61.3	N	Catalyst, Colorant, Crosslinking Agent, Filler, Intermediates, Lubricant, Other Processing Aids
131-57-7	(2-hydroxy-4-methoxyphenyl)phenyl-methanone	228.247	3.2266	11939.6	10.1722	Antioxidant, Colorant, Filler, Light Stabilizer, Other Processing Aids
13676-54-5	1,1'-(methylenedi-4,1-phenylene)bis-1H-Pyrrole-2,5-dione	358.353	2.51521	25.2112	N	Crosslinking Agent, Intermediates, Other Processing Aids
162881-26-7	1,1'-(phenylphosphinylidene)bis[1-(2,4,6-trimethylphenyl)-methanone	418.473	5.77	3.68376	N	Catalyst, Colorant, Crosslinking Agent, Filler, Initiator, Other Processing Aids
920-66-1	1,1,1,3,3,3-hexafluoro-2-Propanol	168.038	0.775489	153887	9.1762	Intermediates
107-46-0	1,1,1,3,3,3-hexamethyl-disiloxane	162.379	4.38355	1.96587e+06	N
71-55-6	1,1,1-trichloroethane	133.4	2.49	1500	N	Lubricant, Odor Agent, Other Processing Aids, Plasticizer, Solvent
1493-13-6	1,1,1-trifluoro-methanesulfonic acid	150.07	-1.21387	888716	N	Other
127-18-4	1,1,2,2-tetrachloroethene	165.82	3.22667	150	N	Colorant, Intermediates, Lubricant, Other Processing Aids, Solvent
79-00-5	1,1,2-trichloroethane	133.4	1.89	3500	N	Intermediates
79-01-6	1,1,2-trichloroethene	131.38	2.53	1100	N	Catalyst, Colorant, Intermediates, Light Stabilizer, Lubricant, Odor Agent, Other Processing Aids, Solvent
3006-86-8	1,1'-cyclohexylidenebis[2-(1,1-dimethylethyl)peroxide]	260.374	6.5	23.7857	N	Antioxidant, Catalyst, Crosslinking Agent, Initiator, Other Processing Aids, Plasticizer
75-35-4	1,1-dichloroethylene	96.94	2.13	2420	N	Filler, Flame Retardant, Intermediates, Monomer, Odor Agent, Other Processing Aids
111-96-6	1,1'-oxybis[2-methoxy-ethane]	134.175	-0.42	940000	N	Lubricant, Other Processing Aids, Solvent
115-10-6	1,1'-oxybis-methane	46.069	0.1	46000	N	Biocide, Blowing Agent, Colorant, Filler, Intermediates, Lubricant, Odor Agent, Other Processing Aids, Viscosity Modifier
67-68-5	1,1'-sulfinylbis-methane	78.13	-1.07416	1000000	N	Blowing Agent, Other Processing Aids, Solvent
119-64-2	1,2,3,4-tetrahydro-naphthalene	132.206	3.99	47	N	Colorant, Intermediates
87-61-6	1,2,3-trichlorobenzene	181.44	4.07667	18	N	Other
96-18-4	1,2,3-trichloropropane	147.42	2.23848	1750	N	Colorant, Crosslinking Agent, Intermediates, Monomer, Other Processing Aids, Solvent
120-82-1	1,2,4-trichlorobenzene	181.44	4.0175	49	N	Other
81-07-2	1,2-benzisothiazol-3(2H)-one 1,1-dioxide	183.18	-0.112346	4000	2.38722	Biocide, Colorant, Filler, Intermediates, Other Processing Aids
106-93-4	1,2-dibromoethane	187.862	1.85	3910	N	Flame Retardant, Intermediates, Lubricant, Other Processing Aids
95-50-1	1,2-dichlorobenzene	147	3.3925	80	N	Biocide, Colorant, Filler, Lubricant, Plasticizer, Solvent
107-06-2	1,2-dichloroethane	98.95	1.45	8800	N	Intermediates, Monomer, Odor Agent, Other Processing Aids
78-87-5	1,2-dichloropropane	112.98	2.25	2700	N	Other
83-32-9	1,2-dihydro-acenaphthylene	154.212	4.04	3.9	N	Biocide, Colorant, Intermediates
100-97-0	1,3,5,7-Tetraazatricyclo[3.3.1.13,7]decane	140.19	-7.48546	1.81421e+11	9.30546	Colorant, Crosslinking Agent, Filler, Intermediates, Monomer, Other Processing Aids
108-80-5	1,3,5-Triazine-2,4,6(1H,3H,5H)-trione	129.075	-1.19521	26000	N	Biocide, Catalyst, Crosslinking Agent, Flame Retardant, Initiator, Intermediates, Light Stabilizer
108-78-1	1,3,5-Triazine-2,4,6-triamine	126.123	-2.26139	38280	5	Colorant, Filler, Flame Retardant, Intermediates, Light Stabilizer, Monomer, Other Processing Aids, Plasticizer
108-67-8	1,3,5-trimethyl-benzene	120.195	3.61667	48.2	N	Colorant, Crosslinking Agent, Filler, Lubricant, Other Processing Aids
13674-87-8	1,3-Dichloro-, 2,2',2''-phosphate 2-propanol	430.89	3.72653	7	N	Flame Retardant, Plasticizer
541-73-1	1,3-dichlorobenzene	147	3.5175	125	N	Other
280-57-9	1,4-Diazabicyclo[2.2.2]octane	224.392	0.803877	66334.2	polyprotic	Catalyst, Colorant, Crosslinking Agent, Filler, Initiator, Intermediates, Other Processing Aids
123-91-1	1,4-dioxane	88.106	-0.27	1000000	N	Colorant, Filler, Intermediates, Odor Agent, Other Processing Aids
479-27-6	1,8-Naphthalenediamine	158.204	1.25742	380	4.44	Other
109-70-6	1-bromo-3-chloropropane	157.44	2.03059	2240	N	Intermediates
13674-84-5	1-Chloro-, 2,2',2''-phosphate 2-propanol	327.56	2.94101	1600	N	Blowing Agent, Colorant, Filler, Flame Retardant, Intermediates, Other Processing Aids, Plasticizer
100-00-5	1-chloro-4-nitrobenzene	157.55	2.395	243	N	Other
95-14-7	1H-Benzotriazole	119.127	5.7	19800	amphoprotic	Antioxidant, Biocide, Colorant, Filler, Light Stabilizer, Lubricant, Other Processing Aids
80-15-9	1-methyl-1-phenylethylhydroperoxide	152.193	1.36891	3478.03	10.1533	Biocide, Catalyst, Colorant, Crosslinking Agent, Filler, Initiator, Intermediates, Lubricant, Monomer, Other Processing Aids
88-72-2	1-methyl-2-nitro-benzene	137.138	2.3	650	N	Other
99-99-0	1-methyl-4-nitro-benzene	137.138	2.37	442	N	Other
482-89-3	2-(1,3-dihydro-3-oxo-2H-indol-2-ylidene)-1,2-dihydro-3H-indol-3-one	262.268	1.56911	9691.08	amphoprotic	Colorant
88-85-7	2-(1-methylpropyl)-4,6-dinitrophenol	240.215	-4.09	52	4.65	Plasticizer
2440-22-4	2-(2H-benzotriazol-2-yl)-4-methyl-phenol	225.251	4.2	677.027	amphoprotic	Antioxidant, Colorant, Filler, Intermediates, Light Stabilizer, Other Processing Aids
13472-08-7	2,2'-(1,2-diazenediyl)bis[2-methyl-butanenitrile]	192.266	2.89724	2203.15	N	Catalyst, Colorant, Crosslinking Agent, Initiator, Monomer, Other Processing Aids
78-67-1	2,2'-(1,2-diazenediyl)bis[2-methyl-propanenitrile]	164.212	1.1	350	N	Blowing Agent, Catalyst, Colorant, Crosslinking Agent, Filler, Initiator, Intermediates, Other Processing Aids
81-11-8	2,2'-(1,2-ethenediyl)bis[5-amino-benzenesulfonic acid]	370.39	-2.67586	27	amphoprotic	Colorant
76-05-1	2,2,2-trifluoro-acetic acid	114.023	-0.593168	1000000	0.52	Other
22094-93-5	2,2'-[(2,2',5,5'-tetrachloro[1,1'-biphenyl]-4,4'-diyl)bis(2,1-diazenediyl)]bis[N-(2,4-dimethylphenyl)-3-oxo-butanamide]	754.49	0.5	0.00083382	amphoprotic	Biocide, Colorant, Filler, Lubricant, Other Processing Aids
5468-75-7	2,2'-[(3,3'-dichloro[1,1'-biphenyl]-4,4'-diyl)bis(2,1-diazenediyl)]bis[N-(2-methylphenyl)-3-oxo-butanamide]	657.55	0.5	0.046293	amphoprotic	Biocide, Colorant, Filler, Lubricant, Other Processing Aids
5567-15-7	2,2'-[(3,3'-dichloro[1,1'-biphenyl]-4,4'-diyl)bis(2,1-diazenediyl)]bis[N-(4-chloro-2,5-dimethoxyphenyl)-3-oxo-butanamide]	818.49	0.02	0.347392	amphoprotic	Biocide, Colorant, Filler, Intermediates, Lubricant, Other Processing Aids
6358-37-8	2,2'-[(3,3'-dichloro[1,1'-biphenyl]-4,4'-diyl)bis(2,1-diazenediyl)]bis[N-(4-methylphenyl)-3-oxo-butanamide]	657.55	1.1	0.0420168	amphoprotic	Colorant, Filler
3033-62-3	2,2'-oxybis[N,N-dimethyl-ethanamine]	160.261	-2.33927	1.10217e+07	polyprotic	Catalyst, Colorant, Crosslinking Agent, Filler, Initiator, Intermediates, Other Processing Aids
108-20-3	2,2'-oxybis-propane	102.177	2.4	3110	N	Other
6674-22-2	2,3,4,6,7,8,9,10-octahydro-pyrimido[1,2-a]azepine	152.241	-11.151	3.27336e+12	12.951	Colorant, Other Processing Aids
2554-06-5	2,4,6,8-tetraethenyl-2,4,6,8-tetramethyl-cyclotetrasiloxane	344.66	6.38514	3481.12	N	Colorant, Crosslinking Agent, Intermediates, Lubricant, Other Processing Aids
118-79-6	2,4,6-tribromophenol	330.801	2.79972	317111	6.19783	Biocide, Flame Retardant, Intermediates, Other Processing Aids
126-86-3	2,4,7,9-tetramethyl-5-decyne-4,7-diol	226.36	3.3343	1700	N	Biocide, Colorant, Filler, Lubricant, Other Processing Aids
120-83-2	2,4-dichlorophenol	163	0.779498	929032	7.72178	Other
584-84-9	2,4-diisocyanato-1-methyl-benzene	174.159	2.15006	52726.2	N	Blowing Agent, Catalyst, Colorant, Crosslinking Agent, Filler, Intermediates, Monomer, Other Processing Aids
87-62-7	2,6-dimethyl-benzenamine	121.183	1.29325	8240	3.95	Other
83016-70-0	2-[[2-[2-(dimethylamino)ethoxy]ethyl]methylamino]-ethanol	190.287	-2.9362	7.65132e+10	9.09058	Colorant, Filler, Other Processing Aids
88-44-8	2-amino-5-methyl-benzenesulfonic acid	187.21	-1.66365	6000	amphoprotic	Colorant, Intermediates
78-51-3	2-butoxy-, 1,1',1''-phosphate ethanol	398.477	3.44119	663.5	N	Colorant, Flame Retardant, Intermediates, Lubricant, Other Processing Aids, Plasticizer
115-96-8	2-Chloro-, 1,1',1''-phosphate ethanol	285.48	1.75474	7000	N	Flame Retardant, Intermediates, Odor Agent, Other Processing Aids, Plasticizer, Viscosity Modifier
1634-04-4	2-methoxy-2-methyl-propane	88.15	0.94	83000	N	Other
71868-10-5	2-methyl-1-[4-(methylthio)phenyl]-2-(4-morpholinyl)-1-propanone	279.4	2.12205	166.264	4.91848	Catalyst, Colorant, Crosslinking Agent, Filler, Initiator, Light Stabilizer, Other Processing Aids
15214-89-8	2-methyl-2-[(1-oxo-2-propen-1-yl)amino]-1-propanesulfonic acid	207.24	-3.7	1.75367e+06	amphoprotic	Intermediates, Monomer
110553-27-0	2-methyl-4,6-bis[(octylthio)methyl]-phenol	438.77	9.86065	0.027521	10.4221	Antioxidant, Colorant, Heat Stabilizer, Light Stabilizer, Other Processing Aids
88-19-7	2-methyl-benzenesulfonamide	171.21	0.900639	1620	10.0235	Colorant, Intermediates, Plasticizer
79-46-9	2-nitropropane	89.094	-1.26356	17000	8.06647	Colorant, Intermediates, Other Processing Aids, Solvent
77-73-6	3a,4,7,7a-tetrahydro-4,7-methano-1H-indene	132.206	2.78	20	N	Colorant, Filler, Intermediates, Lubricant, Monomer, Other Processing Aids, Plasticizer
108-42-9	3-chloro-benzenamine	127.57	5.76578	5400	3.52	Other
1761-71-3	4,4'-methylenebis(cyclohexylamine)	210.365	0.151847	2.17582e+10	10.6719	Catalyst, Colorant, Crosslinking Agent, Filler, Initiator, Intermediates, Monomer, Other Processing Aids
6864-37-5	4,4'-methylenebis[2-methyl-cyclohexanamine]	238.419	-4.87138	2.82898e+09	10.6714	Colorant, Crosslinking Agent, Filler, Intermediates, Monomer, Other Processing Aids
101-77-9	4,4'-methylenebis-benzenamine	198.269	0.544815	10221.3	4.96	Antioxidant, Catalyst, Colorant, Crosslinking Agent, Initiator, Intermediates, Lubricant, Monomer, Other Processing Aids
80-51-3	4,4'-oxybis-, 1,1'-dihydrazide benzenesulfonic acid	358.39	0.174647	62.5	amphoprotic	Blowing Agent, Crosslinking Agent, Other Processing Aids
80-08-0	4,4'-sulfonylbis-benzenamine	248.3	1.12167	380	2.08474	Catalyst, Crosslinking Agent, Initiator, Intermediates, Monomer, Other Processing Aids
80-09-1	4,4'-sulfonylbis-phenol	250.27	-0.804321	379245	8	Biocide, Colorant, Flame Retardant, Monomer, Other Processing Aids
121-57-3	4-amino-benzenesulfonic acid	173.19	-1.90443	10800	amphoprotic	Plasticizer
123-30-8	4-aminophenol	109.128	-0.09	16000	amphoprotic	Other
100-40-3	4-ethenyl-cyclohexene	108.184	3.23425	50	N	Flame Retardant, Intermediates, Odor Agent
100-43-6	4-ethenyl-pyridine	105.14	0.174766	29100	5.15592	Other
36888-99-0	5,5'-(1H-isoindole-1,3(2H)-diylidene)bis-2,4,6(1H,3H,5H)-pyrimidinetrione	367.277	-2.37337	165989	amphoprotic	Colorant
57-41-0	5,5-diphenyl-2,4-imidazolidinedione	252.273	2.26	4.2e-05		Other
2855-13-2	5-amino-1,3,3-trimethyl-cyclohexanemethanamine	170.3	-6.74662	2.6214e+11	10.5496	Antistatic Agent, Colorant, Crosslinking Agent, Filler, Intermediates, Lubricant, Monomer, Other Processing Aids
3380-34-5	5-chloro-2-(2,4-dichlorophenoxy)-phenol	289.54	2.93405	881.323	8.14	Biocide, Colorant, Light Stabilizer, Odor Agent
1912-24-9	6-chloro-N2-ethyl-N4-(1-methylethyl)-1,3,5-triazine-2,4-diamine	215.69	2.59	31.93	N	Other
120-12-7	Anthracene	178.234	4.4725	0.0434	N	Antioxidant, Colorant, Plasticizer
95-16-9	Benzothiazole	135.18	2.02	4300	-	Catalyst, Colorant, Crosslinking Agent, Initiator
80-43-3	Bis(1-methyl-1-phenylethyl) peroxide	270.372	6.0288	0.317567	N	Catalyst, Crosslinking Agent, Filler, Initiator, Intermediates, Lubricant, Other Processing Aids, Plasticizer, Viscosity Modifier
108-90-7	Chlorobenzene	112.56	2.88	498	N	Colorant, Crosslinking Agent, Filler, Intermediates, Other Processing Aids
75-00-3	Chloroethane	64.51	1.43	6710	N	Other
75-01-4	Chloroethene	62.5	1.52	1100	N	Colorant, Filler, Flame Retardant, Intermediates, Monomer, Other Processing Aids
74-87-3	Chloromethane	50.49	0.91	5320	N	Blowing Agent, Colorant, Intermediates, Other Processing Aids
75-77-4	Chlorotrimethylsilane	108.64	2.55382	66815	N	Colorant, Intermediates, Other Processing Aids
107-66-4	Dibutyl ester phosphoric acid	248.3	-0.128298	2.75629e+12	1.2175	Filler, Intermediates, Lubricant, Other Processing Aids
75-71-8	Dichlorodifluoromethane	120.91	2.24571	280	N	Other
119-61-9	Diphenyl-methanone	182.222	3.18	137	N	Antioxidant, Biocide, Catalyst, Colorant, Crosslinking Agent, Filler, Initiator, Intermediates, Light Stabilizer, Odor Agent, Other Processing Aids
85-42-7	Hexahydro-1,3-isobenzofurandione	154.165	0.801387	118526	N	Colorant, Crosslinking Agent, Intermediates, Lubricant, Monomer, Other Processing Aids
119-65-3	Isoquinoline	129.162	1.45553	130594	5.4	Other Processing Aids
330-54-1	N'-(3,4-dichlorophenyl)-N,N-dimethyl-urea	233.09	2.84	29	N	Biocide, Catalyst, Crosslinking Agent, Initiator, Other Processing Aids
103-90-2	N-(4-hydroxyphenyl)-acetamide	151.165	0.210209	14000	amphoprotic	Intermediates, Monomer
97-74-5	N,N,N',N'-tetramethyl-thiodicarbonic diamide ([(H2N)C(S)]2S)	208.36	1.93865	308	N	Catalyst, Crosslinking Agent, Initiator, Other Processing Aids
60-00-4	N,N'-1,2-ethanediylbis[N-(carboxymethyl)-glycine	292.244	-7.1798	1000	amphoprotic	Antioxidant, Biocide, Catalyst, Colorant, Crosslinking Agent, Filler, Initiator, Intermediates, Lubricant, Odor Agent, Other Processing Aids
97-39-2	N,N'-bis(2-methylphenyl)-guanidine	239.322	2.80717	5.99333e+07	9.93257	Crosslinking Agent
67-43-6	N,N-bis[2-[bis(carboxymethyl)amino]ethyl]-glycine	393.349	-8.75681	4800	amphoprotic	Biocide, Colorant, Filler, Intermediates, Lubricant, Odor Agent, Other Processing Aids
284-95-7, 2680-03-7	N,N-dimethyl-2-propenamide	99.133	-0.24	200227	N	Monomer, Other Processing Aids
102-06-7	N,N'-diphenyl-guanidine	211.268	2.01364	7.88559e+08	9.72952	Catalyst, Crosslinking Agent, Filler, Initiator, Light Stabilizer, Other Processing Aids, Plasticizer
102-08-9	N,N'-diphenyl-thiourea	228.31	2	25.65	amphoprotic	Antioxidant, Catalyst, Crosslinking Agent, Initiator, Light Stabilizer
5026-74-4	N-[4-(2-oxiranylmethoxy)phenyl]-N-(2-oxiranylmethyl)-2-oxiranemethanamine	277.32	0.926512	3933.95	3.25	Intermediates, Other Processing Aids
3030-47-5	N1-[2-(dimethylamino)ethyl]-N1,N2,N2-trimethyl-1,2-ethanediamine	173.304	-2.1	1.40884e+07	polyprotic	Catalyst, Colorant, Crosslinking Agent, Filler, Initiator, Intermediates, Other Processing Aids
91-20-3	Naphthalene	128.174	3.3125	31.7	N	Biocide, Catalyst, Colorant, Filler, Light Stabilizer, Lubricant, Odor Agent, Other Processing Aids, Solvent
3622-84-2	N-butyl-benzenesulfonamide	213.3	2.24968	450	-	Filler, Other Processing Aids, Plasticizer
461-58-5	N-cyanoguanidine	84.082	-1.01128	1.53385e+06	2.42	Catalyst, Colorant, Crosslinking Agent, Filler, Initiator, Intermediates, Other Processing Aids
3710-84-7	N-ethyl-N-hydroxy-ethanamine	89.138	-0.17	348300	amphoprotic	Light Stabilizer
98-95-3	Nitrobenzene	123.111	1.845	1900	N	Other
100-61-8	N-methyl-benzenamine	107.156	0.752618	5620	4.85	Colorant, Lubricant
56-23-5	Tetrachloromethane	153.81	2.76333	846.1	N	Colorant, Other Processing Aids, Solvent
67-66-3	Trichloromethane	119.37	1.96	8700	N	Colorant, Other Processing Aids
78-40-0	Triethyl ester phosphoric acid	182.156	0.8	500000	N	Antioxidant, Colorant, Crosslinking Agent, Filler, Flame Retardant, Intermediates, Other Processing Aids, Plasticizer
	a Data from this table is adpated from Fries et al. (2022)
	b "Other" is classified as fuction outside the main categories listed within this table
	Reference:
	Fries, E., Grewal, T. and Sühring, R., 2022. Persistent, mobile, and toxic plastic additives in Canada: properties and prioritization. Environ. Sci.: Process. Impacts. 24(10), 1945-1956. https://doi.org/10.1039/D2EM00097K
