# Supplementary material
Source: Royal Society of Chemistry journal article supplement (doi:10.1039/d5em01017a)
Supplement: d5em01017a2.pdf [file d5em01017a2.pdf]

## Supplementary Information

# Microplastics and PMT plastic-associated chemicals as co-contaminants in ice shaving waste from an urban ice arena

Yanan Li<sup>a\*</sup>, Ryan H. S. Hutchins<sup>a</sup>, Claire Oswald<sup>b</sup>, Stefania Impellizzeri<sup>a\*</sup>, Roxana Sühling<sup>a\*</sup>

<sup>a</sup> Department of Chemistry and Biology, Toronto Metropolitan University, 350 Victoria St, Toronto, ON,  
M5B 2K3, Canada

<sup>b</sup> Department of Geography and Environmental Studies, Toronto Metropolitan University, 350 Victoria  
St, Toronto, ON, M5B 2K3, Canada

\*Corresponding authors:

Yanan Li, email: [yanan.li@torontomu.ca](mailto:yanan.li@torontomu.ca)

Stefania Impellizzeri, email: [simpellizzeri@torontomu.ca](mailto:simpellizzeri@torontomu.ca)

Roxana Sühling, email: [roxana.suehring@torontomu.ca](mailto:roxana.suehring@torontomu.ca)

# Table of Contents

|                                                                                                                                                                                       |   |
|---------------------------------------------------------------------------------------------------------------------------------------------------------------------------------------|---|
| <b>Fig. SA1.</b> Sampling location map for environmental surface water sites across southern Ontario, Canada covering ten watersheds. ....                                            | 3 |
| <b>Fig. SA2.</b> Scatter plot of total microplastic particles per 100 mL of ice shaving (x-axis) versus the number of polymer types identified (y-axis) across 13 sampling weeks..... | 6 |
| <b>Fig. SA3.</b> The number of total PMT plastic-associated chemicals detected in the source water, ice shaving and surface water samples. ....                                       | 7 |
| <b>Text SA1.</b> Instrumental details of PMT suspect screening .....                                                                                                                  | 3 |
| <b>Text SA2.</b> PMT suspect screening workflow details .....                                                                                                                         | 4 |
| <b>Table SA1</b> Common use and functions of the detected PMT plastic associated chemicals in ice shaving waste with significant difference comparing to source water .....           | 5 |

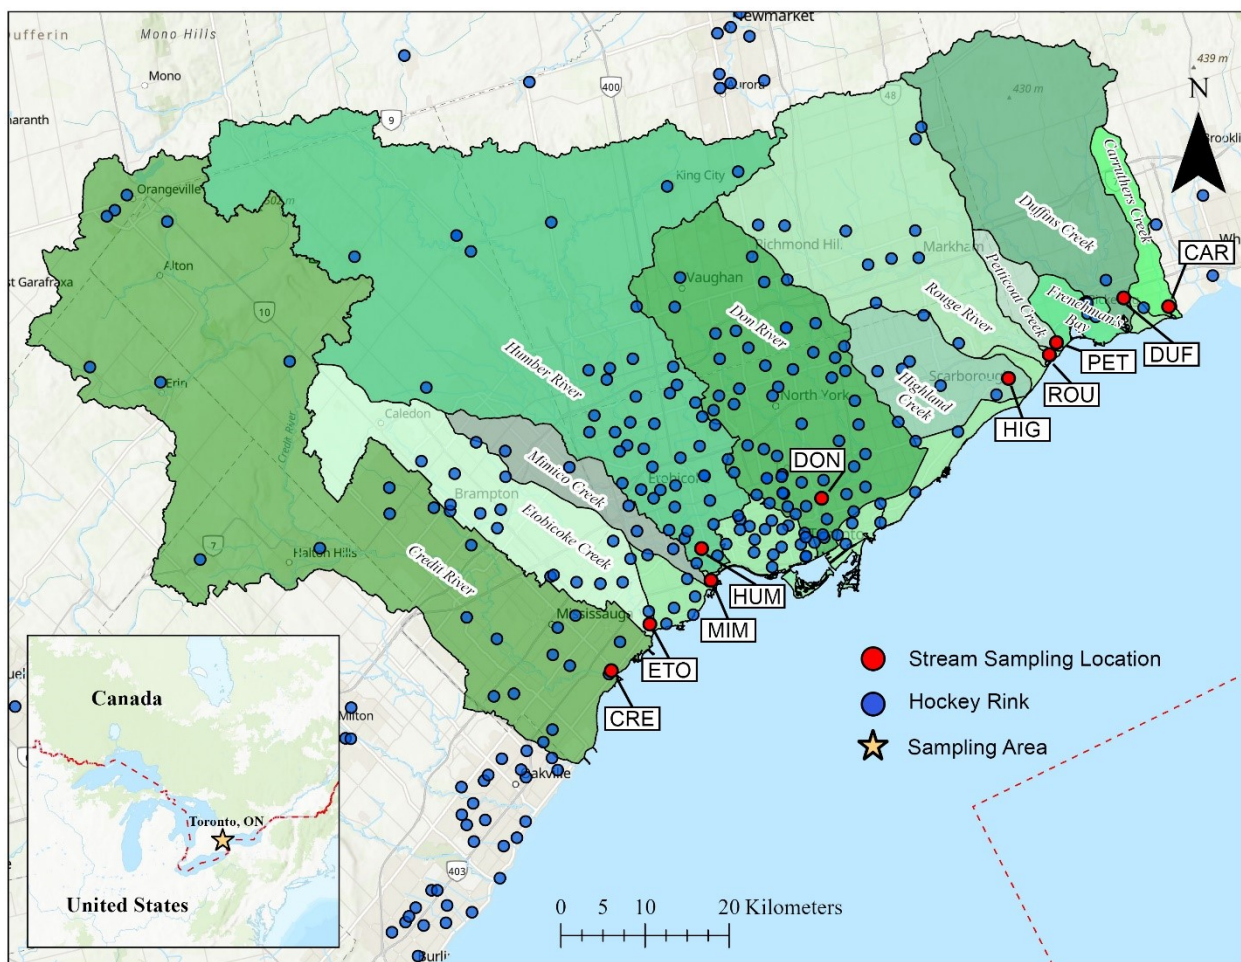

**Fig. SA1.** Sampling location map for environmental surface water sites across southern Ontario, Canada covering ten watersheds.

**Text SA1.** Instrumental details of PMT suspect screening

The separation method used to analyse PMT leachates was previously reported. Briefly, the gradient began with 90% ultrapure water (with 0.1% formic acid) (A), and 10% acetonitrile (B). The organic content was increased to 40% B over five minutes, then to 100% B from five to twelve minutes, where this was held until 21.5 minutes. Finally, initial conditions were restored at 21.51 minutes, and allowed to equilibrate over seven minutes. A flow rate of 0.2 ml·min<sup>-1</sup> was used with a 50 µL injection volume.

The ion source parameters are: 1500 V of nozzle voltage, 275 °C sheath gas temperature at 12 L min<sup>-1</sup>,

150 °C drying gas temperature at 10 L min<sup>-1</sup>, nebulizer pressure at 35 psi, 3500 V capillary voltage, and 75 V fragmentator voltage. Acquisition rate was kept at 1.5 Hz (667 ms/scan).

**Text SA2.** PMT suspect screening workflow details

The leachate samples were analysed for PMTs using the *Target/Suspect Screening* workflow and *Find by Formula* algorithm within the Agilent Qualitative Analysis 10.0 software. The workflow used a library of 124 PMT plastic-associated compounds previously reported in Fries et al. (2022)<sup>1</sup> to tentatively identify these substances in the leachate samples. Leachate blanks were analysed along with the samples to allow for blank-subtraction of the data. Additionally, all samples were spiked with a mixture of internal standards to account for variations in volume and instrument performance. Suspect hits were only taken if they had a matching score >80%, were measured in both sample replicates, were measured at more than one time point, and had a signal-to-noise ratio >3 (or, when measured in the blank, a signal > three-times the standard deviation of the blank signal). Further details and specific suspect screening parameters are also described in a previous work<sup>2</sup>.

**Table SA1** Common use and functions of the detected PMT plastic associated chemicals in ice shaving waste with significant difference comparing to source water

| Name                              | Also known as  | CAS        | Functions and Applications <sup>a</sup>                                                                                                             |
|-----------------------------------|----------------|------------|-----------------------------------------------------------------------------------------------------------------------------------------------------|
| 1,1'-Oxybis[2-methoxy-ethane]     | Diglyme        | 111-96-6   | Lubricant, other processing aids, solvent                                                                                                           |
| 1,4-Diazabicyclo [2, 2, 2] octane | DABCO          | 280-57-9   | Catalyst, colorant, crosslinking agent, filler, initiator, intermediates, other processing aids                                                     |
| 1,3-Diphenylguanidine             | DPG            | 102-06-7   | Catalyst, crosslinking agent, filler, initiator, light stabilizer, other processing aids, plasticizer                                               |
| 1-Methyl-4-nitro-benzene          | 4-nitrotoluene | 99-99-0    | Other processing aids                                                                                                                               |
| Diphenyl-methanone                | Benzophenone   | 119-61-9   | Antioxidant, Biocide, Catalyst, Colorant, Crosslinking Agent, Filler, Initiator, Intermediates, Light Stabilizer, Odor Agent, Other Processing Aids |
| Nitrobenzene                      | -              | 98-95-3    | Other processing aids                                                                                                                               |
| Tris(2-butoxyethyl) phosphate     | TBEP           | 78-51-3    | Colorant, flame retardant, intermediates, lubricant, other processing aids, plasticizer                                                             |
| Tri-(2-chloroisopropyl) phosphate | T CPP          | 13674-84-5 | Blowing agent, colorant, filler, flame retardant, intermediates, other processing aids, plasticizer                                                 |

<sup>a</sup> Adapted from Fries et al. (2022)

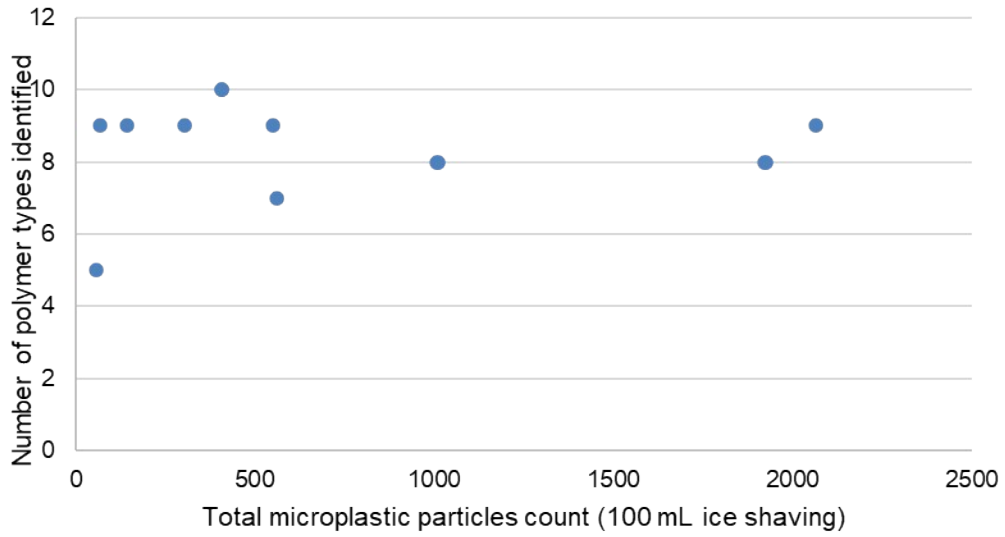

**Fig. SA2.** Scatter plot of total microplastic particles per 100 mL of ice shaving (x-axis) versus the number of polymer types identified (y-axis) across 13 sampling weeks.

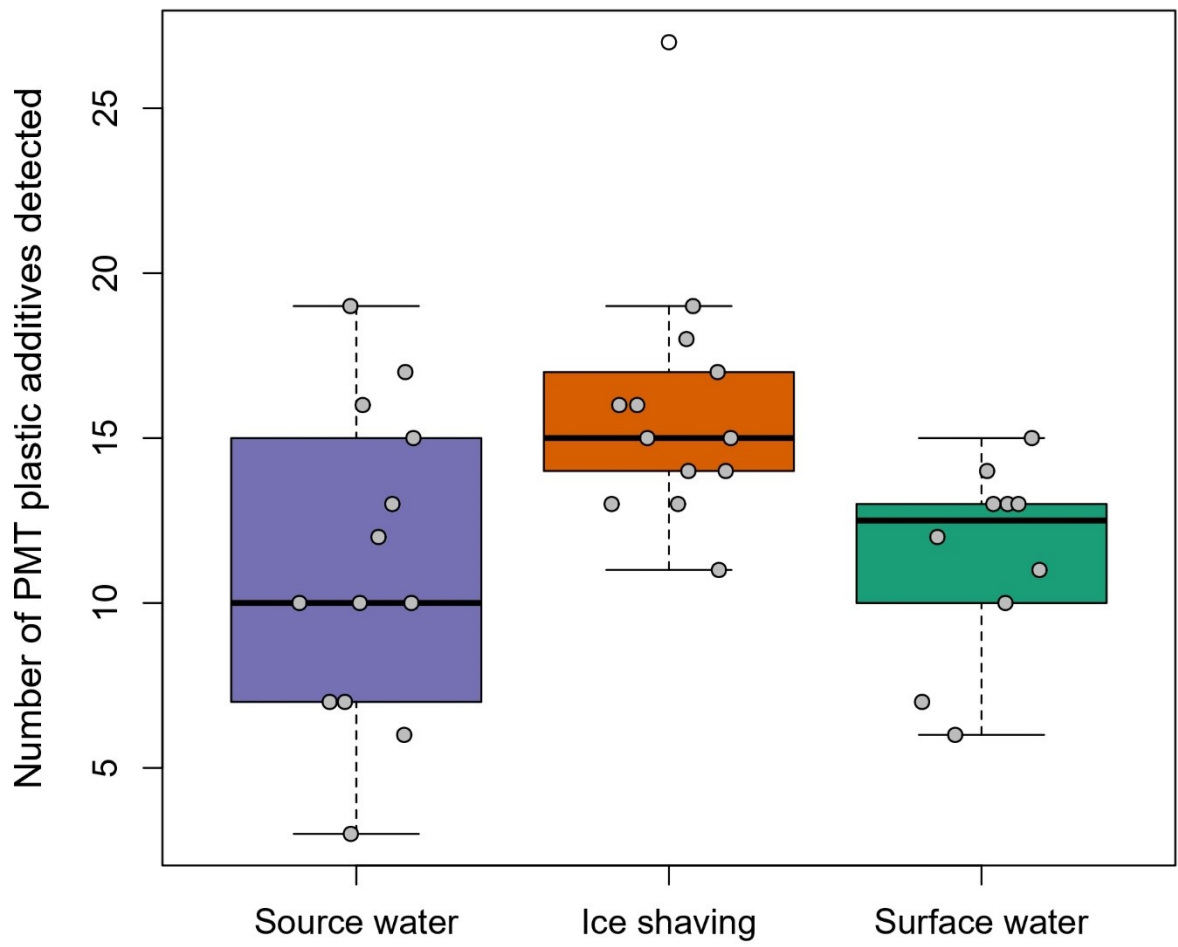

**Fig. SA3.** The number of total PMT plastic-associated chemicals detected in the source water, ice shaving and surface water samples.

## References:

1. E. Fries, T. Grewal and R. Sühring, Persistent, mobile, and toxic plastic additives in Canada: properties and prioritization, *Environ. Sci.: Process. Impacts.*, 2022, 24, 1945-1956,  
<https://doi.org/10.1039/D2EM00097K>
2. E. Fries and R. Sühring, The unusual suspects: Screening for persistent, mobile, and toxic plastic additives in plastic leachates, *Environ. Pollut.*, 2023, 335, 122263,  
<https://doi.org/10.1016/j.envpol.2023.122263>
